# Supplementary material for: Prolyl-4-Hydroxylase 3 (PHD3) Expression Is Downregulated during Epithelial-to-Mesenchymal Transition
Source: PLOS journal article supplement (doi:10.1371/journal.pone.0083021), 2013-12-18

# 18S rRNA

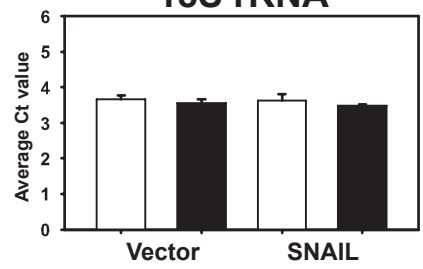

Supplement: S4 (10.1371/journal.pone.0083021.s004) [file journal.pone.0083021.s004]
