# Supplementary material for: Prolyl-4-Hydroxylase 3 (PHD3) Expression Is Downregulated during Epithelial-to-Mesenchymal Transition
Source: PLoS One. 2013 Dec 18;8(12):e83021. doi: 10.1371/journal.pone.0083021 (PMC3867438; doi:10.1371/journal.pone.0083021)
Supplement: Table S1 — Primers used in this study. A list of SYBR Green primers and primer sets used for bisulfite sequencing of the dog PHD3 promoter (meth-PHD3) are listed. F = Forward, R = Reverse. For methylation-specific primers, nested PCR was used with outer primers used in the first reaction, followed by inner primers. (XLSX) [file pone.0083021.s008.xlsx]

## Sheet: Sheet1
Gene	Direction	Primer Sequence 5'-3'
18S	F	GCAATTATTCCCCATGAACG
18S	R	GGGACTTAATCAACGCAAGC
hSNAI1 (SNAIL)	F	CAAGATGCACATCCGAAGC
hSNAI1 (SNAIL)	R	GCAGTGGGGACAGGAGAA
hCDH1 (E-Cadherin)	F	AGATCCATTTCTTGGTCTACGC
hCDH1 (E-Cadherin)	R	TGTGAGCAATTCTGCTTGGA
dPHD3	F	ACCGTAGGAATCCACACGAA
dPHD3	R	TTCAGCATCAAAGTACCAAACAG
dCDH2	F	CAACTTGCCAGAAAACTCCAGG
dCDH2	R	ATGAAACCGGGCTATCAGCTC
dCdh1	F	TCTCCACCAGAGTTAGGCTGA
dCdh1	R	GGCAGCTGATAGGAGGGATA
dSnai1	F	CAAGATGCACATCCGAAGC
dSnai1	R	AGCAGGAAAACGGCTTCTC
dZeb1	F	TAAAAGAGCACTTAAGAATCCACAGT
dZeb2	F	TAAAAGAGCACTTAAGAATCCACAGT
dZeb1	R	TTTCTTGCAGTTTGGGCATT
dZeb2	R	ACCAGAATGGGAAAAACGTTT
dVEGFA	F	CTACCTCCACCATGCCAAGT
dVEGFA	R	CTTCGTGGGGTTTGTGCT
dPHD2	F	AAACGGAGATGGAAGATGTGT
dPHD2	R	GGGTTCAATGTCAGCAAACTG
dPHD1	F	CGCCTAGGTGGCTATGTCA
dPHD1	R	GATTGTCAACATGCCTCACG
dCA-IX	F	CACATTTGGAAGAAATCACTGAA
dCA-IX	R	AGACCCCTCATAGCGGAAGT
dTwist1	F	CATCTTGGAGTCCAGCTCGT
dTwist1	R	AGCAAGATCCAGACGCTCA
meth-PHD3	F outer	TTTTATTTGGATTTTTGGGAATTT
meth-PHD3	R outer	ATTCTATTCAAAAAATAACCAACCC
meth-PHD3	F inner	TTGTTTTAGTTAATAGAAGGTTATGGTAAT
meth-PHD3	R inner	AAATTTAAAACAACTTTCCCCTCTC
